# Supplementary material
Source: PubMed Central journal article supplement (PMC2730739)
Supplement: NIHMS121377-supplement-1_si_001.pdf [file NIHMS121377-supplement-1_si_001.pdf]

1

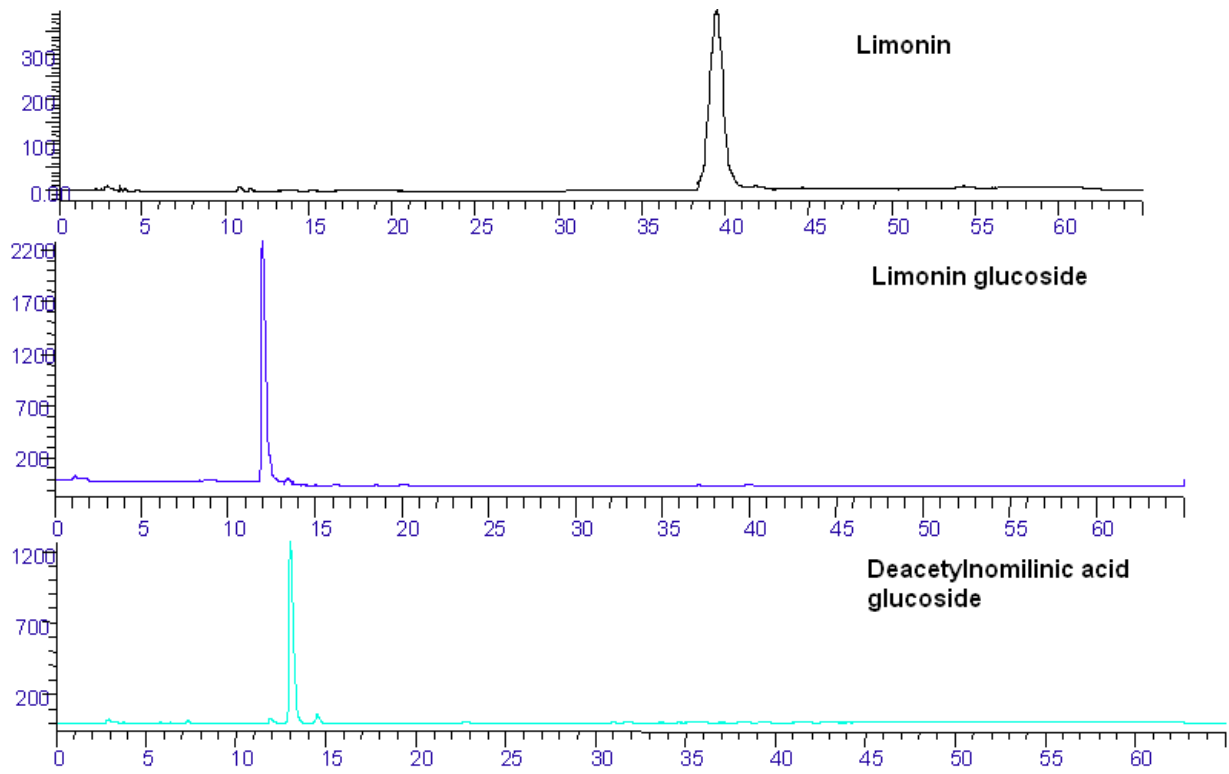

**Figure 1S.** HPLC chromatograms of purified citrus limonoids.

2  
3  
4  
5

1

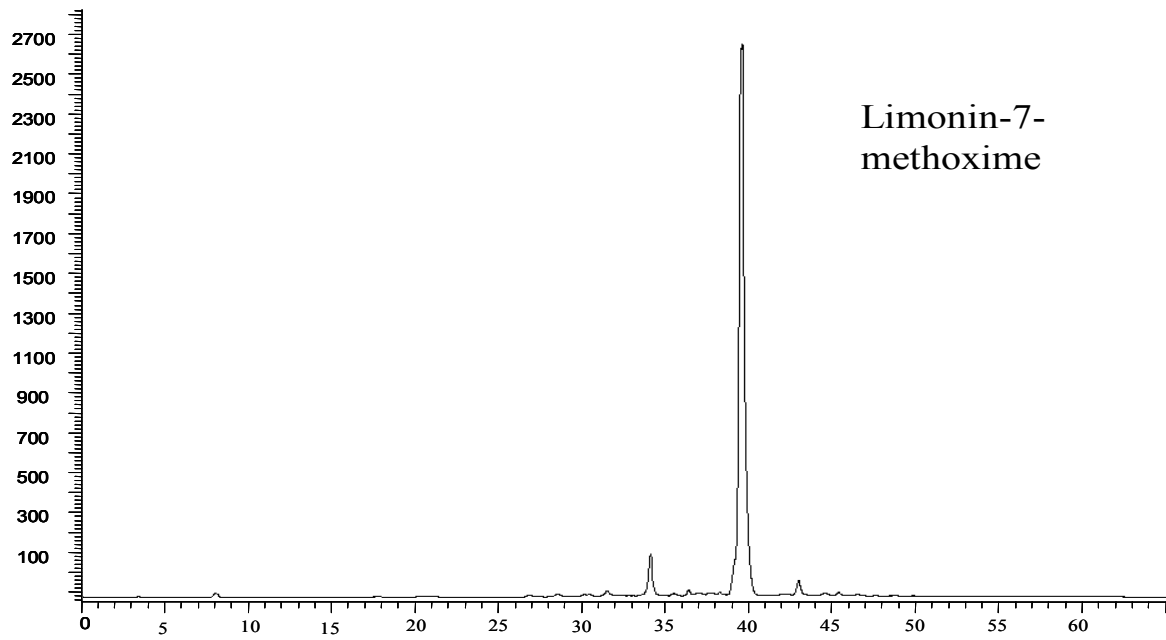

2

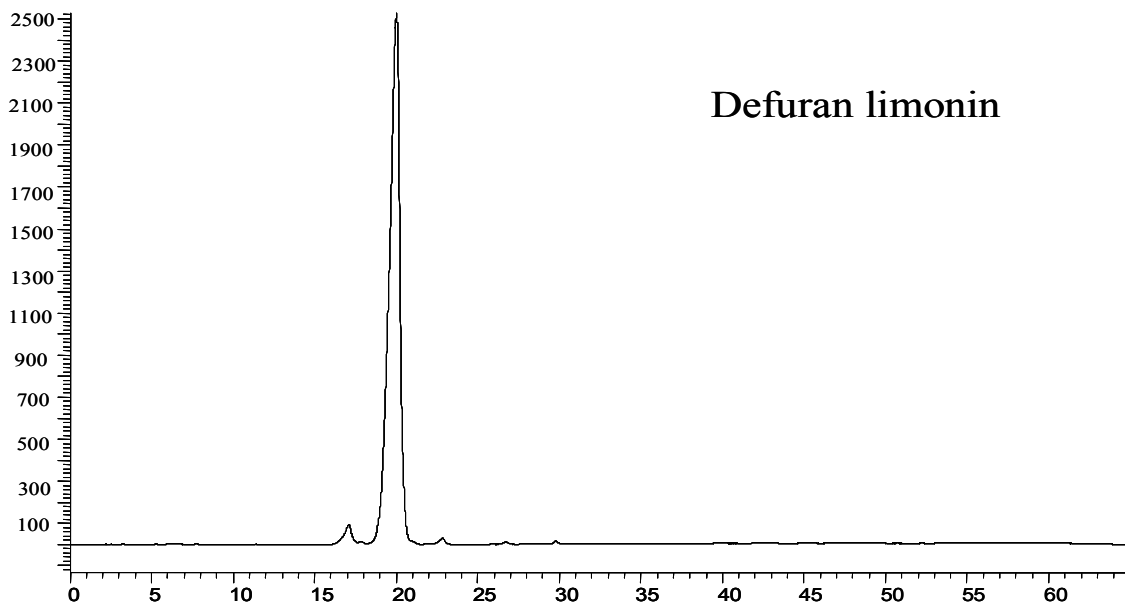

3

4

5

6

7

8

9

10

**Figure 2S.** HPLC chromatogram of modified compounds
